# Supplementary material
Source: PubMed Central journal article supplement (PMC3286628)
Supplement: NIHMS52898-supplement-01.pdf [file NIHMS52898-supplement-01.pdf]

# Supporting Information

## Conformational Analyses of Thiirane-Based Gelatinase Inhibitors

Mijoon Lee, Dusan Heseck, Qicun Shi, Bruce C. Noll, Jed F. Fisher, Mayland Chang\* and Shahriar Mobashery\*

*Department of Chemistry and Biochemistry and the Walther Cancer Research Center, University of Notre Dame, Notre Dame, IN 46556 USA*

### Syntheses of compounds 1-3

Compound **1** was synthesized according to the literature procedure developed in our laboratory.<sup>1</sup>

**2-Bromo-1,3-dimethyl-5-phenoxybenzene (5b)**. The procedure was modified from that reported by Ma and Cai.<sup>2</sup> A mixture of 4-bromo-3,5-dimethylphenol (**4b**, 5.0 g, 25 mmol), 4-iodobenzene (5.6 mL, 50 mmol), Cs<sub>2</sub>CO<sub>3</sub> (8.1 g, 25 mmol), *N,N*-dimethylglycine hydrochloride salt (1.0 g, 7.2 mmol), CuI (0.24 g, 1.3 mmol) in degassed 1,4-dioxane (50 mL) was heated at 90 °C for 3.5 h under a nitrogen atmosphere. After dilution with water, the mixture was extracted with ethyl acetate. The combined organic layer was washed with water and brine, dried over anhydrous MgSO<sub>4</sub>, and concentrated under reduced pressure. The resultant residue was purified by silica gel column chromatography (hexane to ethyl acetate/hexane = 1/20) to give the title compound as a colorless oil (2.5 g, 40%). <sup>1</sup>H NMR (500 MHz, CDCl<sub>3</sub>) δ 2.44 (s, 6H), 6.82 (s, 2H), 7.06 (d, *J* = 8.0 Hz, 2H), 7.18 (t, *J* = 7.4 Hz, 1H), 7.40 (t, *J* = 7.9 Hz, 2 H); <sup>13</sup>C NMR (126 MHz, CDCl<sub>3</sub>) δ 24.2, 118.8, 119.0, 121.2, 123.5, 129.9, 139.8, 155.9, 157.2; HRMS (FAB) calcd for C<sub>14</sub>H<sub>13</sub>BrO (M<sup>+</sup>) 276.0150, found 276.0147.

**1-Chloro-3-(2,6-dimethyl-4-phenoxyphenylsulfanyl)propan-2-ol (6b)**. This was prepared from **5b** according to a literature procedure developed in our laboratory.<sup>1,3</sup> <sup>1</sup>H NMR (500 MHz, CDCl<sub>3</sub>) δ 2.54 (s, 6H), 2.73 (br. s., 1H), 2.83 (dd, *J* = 13.4, 7.2 Hz, 1H), 2.89 (dd, *J* = 13.4, 5.6

Hz, 1H), 3.66 (dd,  $J = 11.2, 5.8$  Hz, 1H), 3.73 (dd,  $J = 11.2, 4.2$  Hz, 1H), 3.85 (m, 1H), 6.78 (s, 2H), 7.05 (d,  $J = 8.4$  Hz, 2H), 7.16 (t,  $J = 7.4$  Hz, 1H), 7.38 (t,  $J = 7.9$  Hz, 2 H);  $^{13}\text{C}$  NMR (126 MHz,  $\text{CDCl}_3$ )  $\delta$  22.4, 39.8, 48.4, 70.4, 118.1, 119.6, 123.9, 126.3, 130.0, 145.0, 156.5, 157.7; HRMS (FAB) calcd for  $\text{C}_{17}\text{H}_{19}\text{ClO}_2\text{S}$  ( $\text{M}^+$ ) 322.0794, found 322.0811.

**2-(2,6-Dimethyl-4-phenoxybenzenesulfonylmethyl)-oxirane (7b).** This was prepared from **6b** according to a literature procedure developed in our laboratory.<sup>1,3</sup>  $^1\text{H}$  NMR (500 MHz,  $\text{CDCl}_3$ )  $\delta$  2.53 (dd,  $J = 4.8, 2.4$  Hz, 1H), 2.65 (s, 6H), 2.85 (t,  $J = 4.3$  Hz, 1H), 3.23 (dd,  $J = 13.8, 4.8$  Hz, 1H), 3.34 (m, 1H), 3.40 (dd,  $J = 14.0, 6.6$  Hz, 1H), 6.72 (s, 2H), 7.07 (d,  $J = 7.6$  Hz, 2H), 7.24 (t,  $J = 7.6$  Hz, 1H), 7.42 (t,  $J = 8.0$  Hz, 2 H);  $^{13}\text{C}$  NMR (126 MHz,  $\text{CDCl}_3$ )  $\delta$  23.5, 45.9, 46.1, 59.7, 119.7, 120.7, 125.2, 129.9, 130.3, 143.2, 154.9, 161.1; HRMS (FAB) calcd for  $\text{C}_{17}\text{H}_{19}\text{O}_4\text{S}$  ( $\text{M}+\text{H}^+$ ) 319.1004, found 319.1000.

**2-(2,6-Dimethyl-4-phenoxy-benzenesulfonylmethyl)-thiirane (3).** This was prepared from **7b** according to a literature procedure developed in our laboratory.<sup>1,3</sup>  $^1\text{H}$  NMR (500 MHz,  $\text{CDCl}_3$ )  $\delta$  2.22 (m, 1H), 2.57 (m, 1H), 2.64 (s, 6H), 3.16 (m, 3H), 3.56 (dd,  $J = 13.4, 4.8$  Hz, 1H), 6.72 (s, 2H), 7.07 (d,  $J = 7.8$  Hz, 2H), 7.24 (m, 1H), 7.41 (t,  $J = 8.0$  Hz, 2 H);  $^{13}\text{C}$  NMR (126 MHz,  $\text{CDCl}_3$ )  $\delta$  23.5, 24.4, 26.1, 62.5, 119.8, 120.5, 125.1, 129.2, 130.3, 143.3, 154.9, 161.0; HRMS (FAB) calcd for  $\text{C}_{17}\text{H}_{19}\text{O}_3\text{S}_2$  ( $\text{M}+\text{H}^+$ ) 335.0776, found 335.0758.

Synthetic transformation of compound **4a** to compound **2** was done by same method for the synthesis of compound **3** from **4b**.

**1-Bromo-2-methyl-4-phenoxybenzene (5a).**  $^1\text{H}$  NMR (500 MHz,  $\text{CDCl}_3$ )  $\delta$  2.38 (s, 3H), 6.73 (dd,  $J = 8.7, 2.7$  Hz, 1H), 6.92 (d,  $J = 2.6$  Hz, 1H), 7.02 (d,  $J = 8.4$  Hz, 2H), 7.14 (t,  $J = 7.2$  Hz, 1H), 7.36 (t,  $J = 7.7$  Hz, 2H), 7.47 (d,  $J = 8.8$  Hz, 1 H);  $^{13}\text{C}$  NMR (126 MHz,  $\text{CDCl}_3$ )  $\delta$  23.3, 118.0, 118.4, 119.1, 121.3, 123.7, 130.0, 133.4, 139.6, 156.7, 157.1; HRMS (FAB) calcd for  $\text{C}_{13}\text{H}_{11}\text{BrO}$  ( $\text{M}^+$ ) 262.9993, found 262.9985.

**2-(2-Methyl-4-phenoxybenzenesulfonylmethyl)-oxirane (7a).**  $^1\text{H}$  NMR (500 MHz,  $\text{CDCl}_3$ )  $\delta$  2.46 (dd,  $J = 4.5, 2.3$  Hz, 1H), 2.59 (s, 3H), 2.75 (t,  $J = 4.3$  Hz, 1H), 3.19 - 3.37 (m, 3H), 6.83 - 6.91 (m, 2H), 7.04 (d,  $J = 8.0$  Hz, 2H), 7.20 (t,  $J = 7.4$  Hz, 1H), 7.38 (t,  $J = 7.8$  Hz, 2H), 7.93 (d,  $J = 8.8$  Hz, 1 H);  $^{13}\text{C}$  NMR (126 MHz,  $\text{CDCl}_3$ )  $\delta$  20.5, 45.7, 45.7, 58.7, 114.7, 120.4, 120.8, 125.0, 130.1, 130.8, 132.6, 140.8, 154.7, 162.3; HRMS (FAB) calcd for  $\text{C}_{16}\text{H}_{17}\text{O}_4\text{S}$  ( $\text{M}+\text{H}^+$ ) 305.0848, found 305.0846.

**2-(2-Methyl-4-phenoxy-benzenesulfonylmethyl)-thiirane (2).**  $^1\text{H}$  NMR (500 MHz,  $\text{CDCl}_3$ )  $\delta$

2.20 (d,  $J = 5.0$  Hz, 1H), 2.55 (d,  $J = 6.0$  Hz, 1H), 2.64 (s, 3H), 3.08 (m, 1H), 3.22 (dd,  $J = 14.2$ , 7.8 Hz, 1H), 3.59 (dd,  $J = 14.3$ , 5.7 Hz, 1H), 6.92 (m, 2H), 7.10 (d,  $J = 8.4$  Hz, 2H), 7.27 (t,  $J = 7.4$  Hz, 1H), 7.45 (t,  $J = 7.8$  Hz, 2H), 7.98 (d,  $J = 9.4$  Hz, 1 H);  $^{13}\text{C}$  NMR (126 MHz,  $\text{CDCl}_3$ )  $\delta$  20.9, 24.4, 26.3, 62.0, 115.2, 120.6, 121.2, 125.3, 130.4, 133.3, 141.1, 155.0, 162.7; HRMS (FAB) calcd for  $\text{C}_{16}\text{H}_{17}\text{O}_3\text{S}_2$  ( $\text{M}+\text{H}^+$ ) 321.0619, found 321.0612.

## References

1. Lim, I. T.; Brown, S.; Mobashery, S., *J. Org. Chem.* **2004**, *69*, 3572.
2. Ma, D. W.; Cai, Q., *Org. Lett.* **2003**, *5*, 3799.
3. Lee, M.; Bernardo, M. M.; Meroueh, S. O.; Brown, S.; Fridman, R.; Mobashery, S., *Org. Lett.* **2005**, *7*, 4463.
4. Reference 24. Case, D. A.; Darden, T. A.; T.E. Cheatham, I.; Simmerling, C. L.; Wang, J.; Duke, R. E.; Luo, R.; Merz, K. M.; Wang, B.; Pearlman, D. A.; Crowley, M.; Brozell, S.; Tsui, V.; Gohlke, H.; Mongan, J.; Hornak, V.; Cui, G.; Beroza, P.; Schafmeister, C.; Caldwell, J. W.; Ross, W. S.; Kollman, P. A. *AMBER 8*; University of California: San Francisco, 2004.
5. Reference 26. Frisch, M. J.; Trucks, G. W.; H. B. Schlegel; G. E. Scuseria; M. A. Robb; J. R. Cheeseman; J. A. Montgomery, J.; T. Vreven; K. N. Kudin; J. C. Burant; J. M. Millam; S. S. Iyengar; J. Tomasi; V. Barone; B. Mennucci; M. Cossi; G. Scalmani; N. Rega; G. A. Petersson; H. Nakatsuji; M. Hada; M. Ehara; K. Toyota; R. Fukuda; J. Hasegawa; M. Ishida; T. Nakajima; Y. Honda; O. Kitao; H. Nakai; M. Klene; X. Li; J. E. Knox; H. P. Hratchian; J. B. Cross; Adamo, C.; Jaramillo, J.; Gomperts, R.; Stratmann, R. E.; Yazyev, O.; Austin, A. J.; Cammi, R.; Pomelli, C.; Ochterski, J. W.; Ayala, P. Y.; Morokuma, K.; Voth, G. A.; Salvador, P.; Dannenberg, J. J.; Zakrzewski, V. G.; Dapprich, S.; Daniels, A. D.; Strain, M. C.; Farkas, O.; Malick, D. K.; Rabuck, A. D.; Raghavachari, K.; Foresman, J. B.; Ortiz, J. V.; Cui, Q.; Baboul, A. G.; Clifford, S.; Cioslowski, J.; Stefanov, B. B.; Liu, G.; Liashenko, A.; Piskorz, P.; Komaromi, I.; Martin, R. L.; Fox, D. J.; Keith, T.; Al-Laham, M. A.; Peng, C. Y.; Nanayakkara, A.; Challacombe, M.; Gill, P. M. W.; Johnson, B.; Chen, W.; Wong, M. W.; Gonzalez, C.; Pople, J. A. *Gaussian 03, Revision C.02*; Gaussian, Inc.: Wallingford, CT, 2004.

**Table S1-1.** Crystal data and structure refinement for compound **1**.

|                                   |                                                               |                   |
|-----------------------------------|---------------------------------------------------------------|-------------------|
| Identification code               | dh11_1_0m                                                     |                   |
| Empirical formula                 | C <sub>15</sub> H <sub>14</sub> O <sub>3</sub> S <sub>2</sub> |                   |
| Formula weight                    | 306.38                                                        |                   |
| Temperature                       | 100(2) K                                                      |                   |
| Wavelength                        | 1.54178 Å                                                     |                   |
| Crystal system                    | Monoclinic                                                    |                   |
| Space group                       | P 21/c                                                        |                   |
| Unit cell dimensions              | a = 5.40350(10) Å                                             | α = 90°.          |
|                                   | b = 28.1118(6) Å                                              | β = 95.7320(10)°. |
|                                   | c = 9.3269(2) Å                                               | γ = 90°.          |
| Volume                            | 1409.69(5) Å <sup>3</sup>                                     |                   |
| Z                                 | 4                                                             |                   |
| Density (calculated)              | 1.444 Mg/m <sup>3</sup>                                       |                   |
| Absorption coefficient            | 3.464 mm <sup>-1</sup>                                        |                   |
| F(000)                            | 640                                                           |                   |
| Crystal size                      | 0.36 x 0.19 x 0.09 mm <sup>3</sup>                            |                   |
| Crystal color and habit           | clear colorless block                                         |                   |
| Diffractometer                    | Bruker SMART Apex CCD diffractometer                          |                   |
| Theta range for data collection   | 3.14 to 69.55°.                                               |                   |
| Index ranges                      | -4 ≤ h ≤ 6, -32 ≤ k ≤ 32, -11 ≤ l ≤ 10                        |                   |
| Reflections collected             | 12650                                                         |                   |
| Independent reflections           | 2424 [R(int) = 0.0287]                                        |                   |
| Observed reflections (I > 2σ(I))  | 2266                                                          |                   |
| Completeness to theta = 69.55°    | 91.0 %                                                        |                   |
| Absorption correction             | Semi-empirical from equivalents                               |                   |
| Max. and min. transmission        | 0.7434 and 0.3677                                             |                   |
| Solution method                   | XS (Sheldrick, 2001)                                          |                   |
| Refinement method                 | XL (Sheldrick, 2001)                                          |                   |
| Data / restraints / parameters    | 2424 / 0 / 200                                                |                   |
| Goodness-of-fit on F <sup>2</sup> | 1.049                                                         |                   |
| Final R indices [I > 2σ(I)]       | R1 = 0.0366, wR2 = 0.0952                                     |                   |
| R indices (all data)              | R1 = 0.0392, wR2 = 0.0969                                     |                   |
| Largest diff. peak and hole       | 0.424 and -0.332 e.Å <sup>-3</sup>                            |                   |

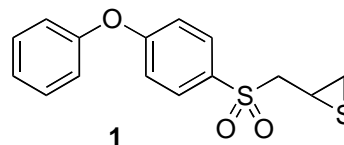

**Table S1-2.** Atomic coordinates and equivalent isotropic displacement parameters ( $\text{\AA}^2$ ) for compound **1**.  $U(\text{eq})$  is defined as one third of the trace of the orthogonalized  $U_{ij}$  tensor.

|        | x           | y            | z           | $U(\text{eq})$ |
|--------|-------------|--------------|-------------|----------------|
| S(1)   | 0.81010(9)  | 0.444237(17) | 0.87821(5)  | 0.02256(16)    |
| S(2)   | 0.65494(11) | 0.57244(2)   | 0.61309(6)  | 0.03166(18)    |
| O(1)   | 0.5727(3)   | 0.28873(5)   | 0.46374(14) | 0.0261(3)      |
| O(2)   | 1.0718(3)   | 0.45435(5)   | 0.87674(17) | 0.0298(4)      |
| O(3)   | 0.7156(3)   | 0.43243(5)   | 1.01242(16) | 0.0291(3)      |
| C(1)   | 0.4185(4)   | 0.25088(7)   | 0.4959(2)   | 0.0227(4)      |
| C(2)   | 0.5027(4)   | 0.21787(8)   | 0.5993(2)   | 0.0276(5)      |
| C(3)   | 0.3550(5)   | 0.17865(8)   | 0.6214(2)   | 0.0339(5)      |
| C(4)   | 0.1257(5)   | 0.17325(8)   | 0.5413(2)   | 0.0351(6)      |
| C(5)   | 0.0445(4)   | 0.20684(9)   | 0.4393(2)   | 0.0324(5)      |
| C(6)   | 0.1905(4)   | 0.24614(8)   | 0.4155(2)   | 0.0263(5)      |
| C(7)   | 0.6213(4)   | 0.32372(7)   | 0.5653(2)   | 0.0199(4)      |
| C(8)   | 0.4711(3)   | 0.33211(7)   | 0.6754(2)   | 0.0198(4)      |
| C(9)   | 0.5283(3)   | 0.36926(7)   | 0.7706(2)   | 0.0188(4)      |
| C(10)  | 0.7361(3)   | 0.39734(7)   | 0.7553(2)   | 0.0184(4)      |
| C(11)  | 0.8853(4)   | 0.38903(7)   | 0.6446(2)   | 0.0207(4)      |
| C(12)  | 0.8274(4)   | 0.35236(7)   | 0.5491(2)   | 0.0218(4)      |
| C(13)  | 0.6423(10)  | 0.49499(19)  | 0.8177(5)   | 0.0185(10)     |
| C(13') | 0.620(2)    | 0.4913(5)    | 0.7604(12)  | 0.020(2)       |
| C(14)  | 0.7244(6)   | 0.50990(10)  | 0.6717(3)   | 0.0246(9)      |
| C(14') | 0.7422(14)  | 0.5376(3)    | 0.7714(8)   | 0.031(2)       |
| C(15)  | 0.9476(5)   | 0.54217(10)  | 0.6721(3)   | 0.0403(6)      |

**Table S1-3.** Bond lengths [ $\text{\AA}$ ] and angles [ $^\circ$ ] for compound **1**.

|             |            |             |            |
|-------------|------------|-------------|------------|
| S(1)-O(3)   | 1.4370(16) | S(1)-O(2)   | 1.4440(16) |
| S(1)-C(13)  | 1.754(5)   | S(1)-C(10)  | 1.7666(19) |
| S(1)-C(13') | 1.945(11)  | S(2)-C(14') | 1.795(7)   |
| S(2)-C(15)  | 1.832(3)   | S(2)-C(14)  | 1.868(3)   |
| O(1)-C(7)   | 1.372(2)   | O(1)-C(1)   | 1.402(2)   |
| C(1)-C(2)   | 1.382(3)   | C(1)-C(6)   | 1.383(3)   |
| C(2)-C(3)   | 1.389(3)   | C(2)-H(2)   | 0.9500     |
| C(3)-C(4)   | 1.390(4)   | C(3)-H(3)   | 0.9500     |

|                   |            |                   |            |
|-------------------|------------|-------------------|------------|
| C(4)-C(5)         | 1.380(4)   | C(4)-H(4)         | 0.9500     |
| C(5)-C(6)         | 1.389(3)   | C(5)-H(5)         | 0.9500     |
| C(6)-H(6)         | 0.9500     | C(7)-C(8)         | 1.391(3)   |
| C(7)-C(12)        | 1.395(3)   | C(8)-C(9)         | 1.386(3)   |
| C(8)-H(8)         | 0.9500     | C(9)-C(10)        | 1.391(3)   |
| C(9)-H(9)         | 0.9500     | C(10)-C(11)       | 1.392(3)   |
| C(11)-C(12)       | 1.378(3)   | C(11)-H(11)       | 0.9500     |
| C(12)-H(12)       | 0.9500     | C(13)-C(14)       | 1.532(6)   |
| C(13)-H(13A)      | 0.9900     | C(13)-H(13B)      | 0.9900     |
| C(13')-C(14')     | 1.458(15)  | C(13')-H(13C)     | 0.9900     |
| C(13')-H(13D)     | 0.9900     | C(14)-C(15)       | 1.509(4)   |
| C(14)-H(14)       | 1.0000     | C(14')-C(15)      | 1.521(8)   |
| C(14')-H(14')     | 1.0000     | C(15)-H(15A)      | 0.9900     |
| C(15)-H(15B)      | 0.9900     |                   |            |
| O(3)-S(1)-O(2)    | 119.15(9)  | O(3)-S(1)-C(13)   | 104.54(18) |
| O(2)-S(1)-C(13)   | 108.2(2)   | O(3)-S(1)-C(10)   | 108.42(9)  |
| O(2)-S(1)-C(10)   | 107.41(9)  | C(13)-S(1)-C(10)  | 108.78(16) |
| O(3)-S(1)-C(13')  | 115.8(4)   | O(2)-S(1)-C(13')  | 108.8(4)   |
| C(13)-S(1)-C(13') | 15.9(3)    | C(10)-S(1)-C(13') | 93.9(4)    |
| C(14')-S(2)-C(15) | 49.6(3)    | C(14')-S(2)-C(14) | 38.5(3)    |
| C(15)-S(2)-C(14)  | 48.13(12)  | C(7)-O(1)-C(1)    | 118.24(15) |
| C(2)-C(1)-C(6)    | 121.8(2)   | C(2)-C(1)-O(1)    | 119.83(19) |
| C(6)-C(1)-O(1)    | 118.22(18) | C(1)-C(2)-C(3)    | 118.9(2)   |
| C(1)-C(2)-H(2)    | 120.6      | C(3)-C(2)-H(2)    | 120.6      |
| C(2)-C(3)-C(4)    | 120.1(2)   | C(2)-C(3)-H(3)    | 120.0      |
| C(4)-C(3)-H(3)    | 120.0      | C(5)-C(4)-C(3)    | 120.1(2)   |
| C(5)-C(4)-H(4)    | 120.0      | C(3)-C(4)-H(4)    | 120.0      |
| C(4)-C(5)-C(6)    | 120.5(2)   | C(4)-C(5)-H(5)    | 119.7      |
| C(6)-C(5)-H(5)    | 119.7      | C(1)-C(6)-C(5)    | 118.6(2)   |
| C(1)-C(6)-H(6)    | 120.7      | C(5)-C(6)-H(6)    | 120.7      |
| O(1)-C(7)-C(8)    | 123.03(18) | O(1)-C(7)-C(12)   | 116.04(17) |
| C(8)-C(7)-C(12)   | 120.88(18) | C(9)-C(8)-C(7)    | 119.44(18) |
| C(9)-C(8)-H(8)    | 120.3      | C(7)-C(8)-H(8)    | 120.3      |
| C(8)-C(9)-C(10)   | 119.50(18) | C(8)-C(9)-H(9)    | 120.3      |
| C(10)-C(9)-H(9)   | 120.3      | C(9)-C(10)-C(11)  | 120.94(18) |

|                     |            |                      |            |
|---------------------|------------|----------------------|------------|
| C(9)-C(10)-S(1)     | 119.30(15) | C(11)-C(10)-S(1)     | 119.77(15) |
| C(12)-C(11)-C(10)   | 119.64(18) | C(12)-C(11)-H(11)    | 120.2      |
| C(10)-C(11)-H(11)   | 120.2      | C(11)-C(12)-C(7)     | 119.59(18) |
| C(11)-C(12)-H(12)   | 120.2      | C(7)-C(12)-H(12)     | 120.2      |
| C(14)-C(13)-S(1)    | 108.8(3)   | C(14)-C(13)-H(13A)   | 109.9      |
| S(1)-C(13)-H(13A)   | 109.9      | C(14)-C(13)-H(13B)   | 109.9      |
| S(1)-C(13)-H(13B)   | 109.9      | H(13A)-C(13)-H(13B)  | 108.3      |
| C(14')-C(13')-S(1)  | 111.0(7)   | C(14')-C(13')-H(13C) | 109.4      |
| S(1)-C(13')-H(13C)  | 109.4      | C(14')-C(13')-H(13D) | 109.4      |
| S(1)-C(13')-H(13D)  | 109.4      | H(13C)-C(13')-H(13D) | 108.0      |
| C(15)-C(14)-C(13)   | 117.7(3)   | C(15)-C(14)-S(2)     | 64.67(15)  |
| C(13)-C(14)-S(2)    | 116.7(3)   | C(15)-C(14)-H(14)    | 116.0      |
| C(13)-C(14)-H(14)   | 116.0      | S(2)-C(14)-H(14)     | 116.0      |
| C(13')-C(14')-C(15) | 112.6(7)   | C(13')-C(14')-S(2)   | 110.5(6)   |
| C(15)-C(14')-S(2)   | 66.5(3)    | C(13')-C(14')-H(14') | 118.8      |
| C(15)-C(14')-H(14') | 118.8      | S(2)-C(14')-H(14')   | 118.8      |
| C(14)-C(15)-C(14')  | 47.1(3)    | C(14)-C(15)-S(2)     | 67.20(14)  |
| C(14')-C(15)-S(2)   | 64.0(3)    | C(14)-C(15)-H(15A)   | 117.0      |
| C(14')-C(15)-H(15A) | 163.6      | S(2)-C(15)-H(15A)    | 117.0      |
| C(14)-C(15)-H(15B)  | 117.0      | C(14')-C(15)-H(15B)  | 76.9       |
| S(2)-C(15)-H(15B)   | 117.0      | H(15A)-C(15)-H(15B)  | 114.0      |

**Table S1-4.** Anisotropic displacement parameters ( $\text{\AA}^2$ ) for compound **1**. The anisotropic displacement factor exponent takes the form:  $-2\pi^2[h^2a^{*2}U_{11} + \dots + 2hk a^* b^* U_{12}]$

|      | $U_{11}$   | $U_{22}$   | $U_{33}$   | $U_{23}$     | $U_{13}$    | $U_{12}$     |
|------|------------|------------|------------|--------------|-------------|--------------|
| S(1) | 0.0169(3)  | 0.0162(3)  | 0.0343(3)  | -0.00175(19) | 0.00154(19) | -0.00079(17) |
| S(2) | 0.0353(3)  | 0.0297(3)  | 0.0295(3)  | 0.0066(2)    | 0.0005(2)   | 0.0023(2)    |
| O(1) | 0.0285(8)  | 0.0301(8)  | 0.0206(7)  | -0.0037(6)   | 0.0060(5)   | -0.0095(6)   |
| O(2) | 0.0183(8)  | 0.0243(8)  | 0.0464(9)  | -0.0066(6)   | 0.0014(6)   | -0.0017(6)   |
| O(3) | 0.0283(9)  | 0.0275(8)  | 0.0318(8)  | -0.0078(6)   | 0.0037(6)   | -0.0026(6)   |
| C(1) | 0.0239(11) | 0.0235(11) | 0.0220(9)  | -0.0057(8)   | 0.0085(8)   | -0.0035(8)   |
| C(2) | 0.0281(12) | 0.0312(12) | 0.0241(10) | -0.0038(9)   | 0.0051(8)   | 0.0000(9)    |
| C(3) | 0.0497(15) | 0.0246(12) | 0.0295(11) | -0.0029(9)   | 0.0144(10)  | -0.0005(10)  |
| C(4) | 0.0442(15) | 0.0273(12) | 0.0370(12) | -0.0142(10)  | 0.0193(10)  | -0.0141(10)  |
| C(5) | 0.0250(12) | 0.0402(14) | 0.0333(12) | -0.0167(10)  | 0.0085(9)   | -0.0088(9)   |

|        |            |            |            |            |             |             |
|--------|------------|------------|------------|------------|-------------|-------------|
| C(6)   | 0.0238(12) | 0.0303(12) | 0.0254(10) | -0.0078(8) | 0.0051(8)   | 0.0007(8)   |
| C(7)   | 0.0196(10) | 0.0220(10) | 0.0176(9)  | 0.0029(7)  | -0.0016(7)  | 0.0009(7)   |
| C(8)   | 0.0149(10) | 0.0226(10) | 0.0217(9)  | 0.0043(8)  | 0.0008(7)   | -0.0019(7)  |
| C(9)   | 0.0168(10) | 0.0200(10) | 0.0196(9)  | 0.0041(7)  | 0.0013(7)   | 0.0013(7)   |
| C(10)  | 0.0168(10) | 0.0161(10) | 0.0215(9)  | 0.0034(7)  | -0.0018(7)  | 0.0015(7)   |
| C(11)  | 0.0136(10) | 0.0220(10) | 0.0266(10) | 0.0063(8)  | 0.0019(7)   | -0.0005(7)  |
| C(12)  | 0.0176(11) | 0.0259(11) | 0.0225(10) | 0.0045(8)  | 0.0054(7)   | 0.0008(8)   |
| C(13)  | 0.021(2)   | 0.0184(17) | 0.016(2)   | 0.001(2)   | 0.000(2)    | 0.0019(12)  |
| C(13') | 0.020(4)   | 0.019(5)   | 0.021(6)   | 0.012(5)   | -0.002(5)   | 0.008(3)    |
| C(14)  | 0.0276(18) | 0.0195(16) | 0.0261(17) | 0.0004(13) | -0.0002(12) | 0.0046(12)  |
| C(14') | 0.038(5)   | 0.025(4)   | 0.028(4)   | 0.008(3)   | -0.010(3)   | -0.011(3)   |
| C(15)  | 0.0275(14) | 0.0510(16) | 0.0425(14) | 0.0190(12) | 0.0038(10)  | -0.0013(10) |

---

**Table S1-5.** Hydrogen coordinates and isotropic displacement parameters ( $\text{\AA}^2$ ) for compound **1**.

|        | x       | y      | z      | U(eq) |
|--------|---------|--------|--------|-------|
| H(2)   | 0.6590  | 0.2219 | 0.6542 | 0.033 |
| H(3)   | 0.4108  | 0.1555 | 0.6914 | 0.041 |
| H(4)   | 0.0248  | 0.1464 | 0.5567 | 0.042 |
| H(5)   | -0.1126 | 0.2030 | 0.3850 | 0.039 |
| H(6)   | 0.1351  | 0.2693 | 0.3453 | 0.032 |
| H(8)   | 0.3305  | 0.3125 | 0.6852 | 0.024 |
| H(9)   | 0.4265  | 0.3755 | 0.8458 | 0.023 |
| H(11)  | 1.0262  | 0.4085 | 0.6349 | 0.025 |
| H(12)  | 0.9274  | 0.3466 | 0.4726 | 0.026 |
| H(13A) | 0.4618  | 0.4880 | 0.8077 | 0.022 |
| H(13B) | 0.6740  | 0.5212 | 0.8882 | 0.022 |
| H(13C) | 0.6030  | 0.4808 | 0.6586 | 0.024 |
| H(13D) | 0.4515  | 0.4940 | 0.7923 | 0.024 |
| H(14)  | 0.7064  | 0.4852 | 0.5940 | 0.029 |
| H(14') | 0.7630  | 0.5539 | 0.8672 | 0.037 |
| H(15A) | 1.0628  | 0.5362 | 0.5979 | 0.048 |
| H(15B) | 1.0317  | 0.5513 | 0.7672 | 0.048 |

---



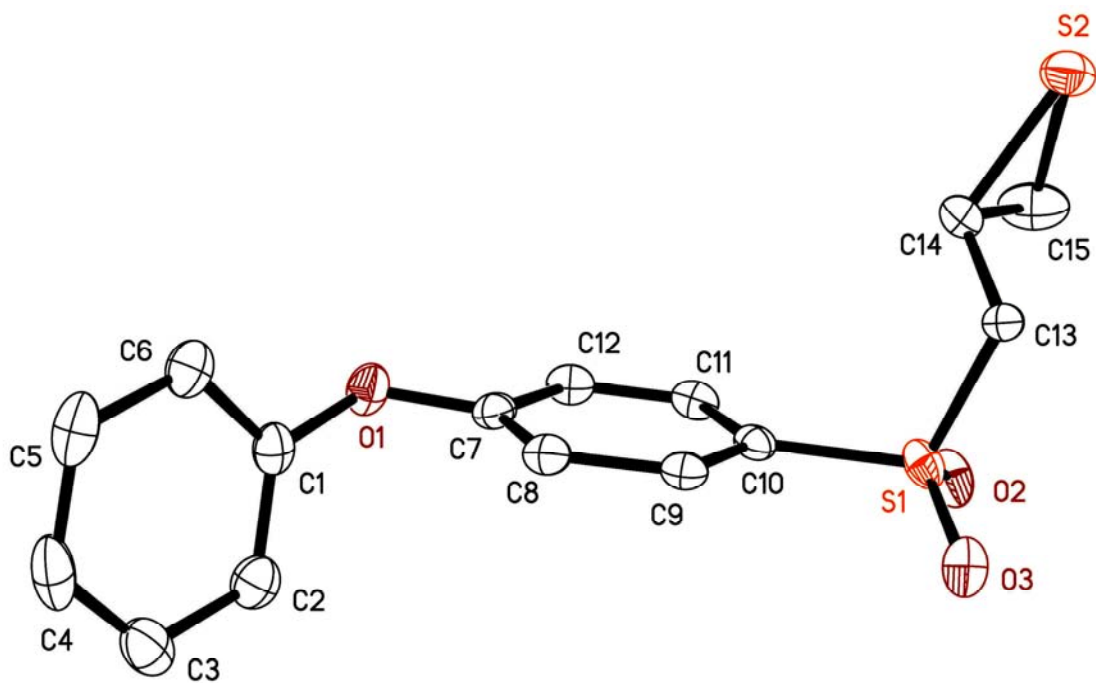

**Figure S1.** The ORTEP diagram of compound **1** is shown at 50% probability level. Hydrogen atoms are omitted for clarity.

**Table S2-1.** Crystal data and structure refinement for compound **2**.

|                                   |                                                               |                 |
|-----------------------------------|---------------------------------------------------------------|-----------------|
| Identification code               | dh28_1_0m                                                     |                 |
| Empirical formula                 | C <sub>16</sub> H <sub>16</sub> O <sub>3</sub> S <sub>2</sub> |                 |
| Formula weight                    | 320.41                                                        |                 |
| Temperature                       | 100(2) K                                                      |                 |
| Wavelength                        | 1.54178 Å                                                     |                 |
| Crystal system                    | Triclinic                                                     |                 |
| Space group                       | P -1                                                          |                 |
| Unit cell dimensions              | a = 5.7744(2) Å                                               | α = 85.695(2)°. |
|                                   | b = 11.2258(4) Å                                              | β = 78.737(2)°. |
|                                   | c = 12.0078(4) Å                                              | γ = 85.483(2)°. |
| Volume                            | 759.59(5) Å <sup>3</sup>                                      |                 |
| Z                                 | 2                                                             |                 |
| Density (calculated)              | 1.401 Mg/m <sup>3</sup>                                       |                 |
| Absorption coefficient            | 3.239 mm <sup>-1</sup>                                        |                 |
| F(000)                            | 336                                                           |                 |
| Crystal size                      | 0.41 x 0.14 x 0.05 mm <sup>3</sup>                            |                 |
| Crystal color and habit           | clear colorless plate                                         |                 |
| Diffractometer                    | Bruker SMART Apex CCD diffractometer                          |                 |
| Theta range for data collection   | 3.76 to 69.72°.                                               |                 |
| Index ranges                      | -5 ≤ h ≤ 6, -13 ≤ k ≤ 13, -14 ≤ l ≤ 14                        |                 |
| Reflections collected             | 8355                                                          |                 |
| Independent reflections           | 2649 [R(int) = 0.0174]                                        |                 |
| Observed reflections (I > 2σ(I))  | 2541                                                          |                 |
| Completeness to theta = 69.72°    | 92.8 %                                                        |                 |
| Absorption correction             | Semi-empirical from equivalents                               |                 |
| Max. and min. transmission        | 0.8445 and 0.3516                                             |                 |
| Solution method                   | XS (Sheldrick, 2001)                                          |                 |
| Refinement method                 | XL (Sheldrick, 2001)                                          |                 |
| Data / restraints / parameters    | 2649 / 0 / 204                                                |                 |
| Goodness-of-fit on F <sup>2</sup> | 1.247                                                         |                 |
| Final R indices [I > 2σ(I)]       | R1 = 0.0423, wR2 = 0.1228                                     |                 |
| R indices (all data)              | R1 = 0.0442, wR2 = 0.1281                                     |                 |
| Largest diff. peak and hole       | 0.532 and -0.401 e.Å <sup>-3</sup>                            |                 |

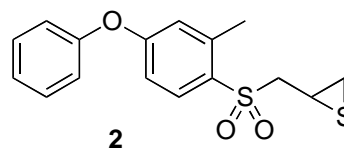

**Table S2-2.** Atomic coordinates and equivalent isotropic displacement parameters ( $\text{\AA}^2$ ) for compound **2**.  $U(\text{eq})$  is defined as one third of the trace of the orthogonalized  $U_{ij}$  tensor.

|        | x           | y            | z           | $U(\text{eq})$ |
|--------|-------------|--------------|-------------|----------------|
| S(1)   | 0.35231(11) | 0.36437(5)   | 0.63090(5)  | 0.0262(2)      |
| O(1)   | 0.1959(3)   | -0.10901(17) | 0.86923(19) | 0.0406(5)      |
| C(1)   | 0.3796(4)   | -0.1950(2)   | 0.8808(2)   | 0.0251(5)      |
| S(2)   | 0.11507(18) | 0.13363(10)  | 0.48214(10) | 0.0342(4)      |
| C(14)  | 0.2520(14)  | 0.2765(5)    | 0.4400(6)   | 0.0295(11)     |
| C(15)  | 0.0707(9)   | 0.2530(6)    | 0.3738(4)   | 0.0384(10)     |
| S(2')  | 0.0546(7)   | 0.1897(5)    | 0.3693(3)   | 0.0413(13)     |
| C(14') | 0.249(5)    | 0.2474(19)   | 0.452(2)    | 0.0295(11)     |
| C(15') | 0.182(4)    | 0.1248(16)   | 0.4874(13)  | 0.0384(10)     |
| O(2)   | 0.5987(3)   | 0.36156(17)  | 0.57707(18) | 0.0368(5)      |
| C(2)   | 0.5608(5)   | -0.1718(2)   | 0.9354(2)   | 0.0291(6)      |
| O(3)   | 0.2599(4)   | 0.46099(17)  | 0.7019(2)   | 0.0424(5)      |
| C(3)   | 0.7254(5)   | -0.2623(2)   | 0.9541(2)   | 0.0293(6)      |
| C(4)   | 0.7109(5)   | -0.3755(2)   | 0.9187(3)   | 0.0348(6)      |
| C(5)   | 0.5305(5)   | -0.3979(2)   | 0.8649(3)   | 0.0357(6)      |
| C(6)   | 0.3636(5)   | -0.3076(2)   | 0.8443(2)   | 0.0263(5)      |
| C(7)   | 0.2461(5)   | 0.0006(2)    | 0.8150(2)   | 0.0275(5)      |
| C(8)   | 0.0649(4)   | 0.0900(2)    | 0.8355(2)   | 0.0252(5)      |
| C(9)   | 0.0881(4)   | 0.2047(2)    | 0.78407(19) | 0.0222(5)      |
| C(10)  | 0.3026(4)   | 0.2255(2)    | 0.7085(2)   | 0.0224(5)      |
| C(11)  | 0.4827(4)   | 0.1359(2)    | 0.6874(2)   | 0.0268(5)      |
| C(12)  | 0.4568(5)   | 0.0223(2)    | 0.7406(2)   | 0.0289(6)      |
| C(13)  | 0.1855(5)   | 0.3692(2)    | 0.5211(2)   | 0.0297(6)      |
| C(16)  | -0.1125(5)  | 0.2985(2)    | 0.8124(2)   | 0.0294(6)      |

---

**Table S2-3.** Bond lengths [ $\text{\AA}$ ] and angles [ $^\circ$ ] for compound **2**.

|             |          |             |          |
|-------------|----------|-------------|----------|
| S(1)-O(3)   | 1.435(2) | S(1)-O(2)   | 1.442(2) |
| S(1)-C(10)  | 1.769(2) | S(1)-C(13)  | 1.774(3) |
| O(1)-C(7)   | 1.373(3) | O(1)-C(1)   | 1.398(3) |
| C(1)-C(6)   | 1.383(3) | C(1)-C(2)   | 1.389(4) |
| S(2)-C(15)  | 1.835(5) | S(2)-C(14)  | 1.837(4) |
| C(14)-C(13) | 1.457(8) | C(14)-C(15) | 1.482(6) |

|                     |            |                      |            |
|---------------------|------------|----------------------|------------|
| C(14)-H(14)         | 1.0000     | C(15)-H(15A)         | 0.9900     |
| C(15)-H(15B)        | 0.9900     | S(2')-C(15')         | 1.8025     |
| S(2')-C(14')        | 1.8142     | C(14')-C(15')        | 1.4689     |
| C(14')-C(13)        | 1.64(3)    | C(14')-H(14')        | 1.0000     |
| C(15')-H(15C)       | 0.9900     | C(15')-H(15D)        | 0.9900     |
| C(2)-C(3)           | 1.373(4)   | C(2)-H(2)            | 0.9500     |
| C(3)-C(4)           | 1.384(4)   | C(3)-H(3)            | 0.9500     |
| C(4)-C(5)           | 1.377(4)   | C(4)-H(4)            | 0.9500     |
| C(5)-C(6)           | 1.385(4)   | C(5)-H(5)            | 0.9500     |
| C(6)-H(6)           | 0.9500     | C(7)-C(12)           | 1.389(4)   |
| C(7)-C(8)           | 1.390(4)   | C(8)-C(9)            | 1.390(3)   |
| C(8)-H(8)           | 0.9500     | C(9)-C(10)           | 1.409(3)   |
| C(9)-C(16)          | 1.508(3)   | C(10)-C(11)          | 1.388(3)   |
| C(11)-C(12)         | 1.388(3)   | C(11)-H(11)          | 0.9500     |
| C(12)-H(12)         | 0.9500     | C(13)-H(13A)         | 0.9900     |
| C(13)-H(13B)        | 0.9900     | C(16)-H(16A)         | 0.9800     |
| C(16)-H(16B)        | 0.9800     | C(16)-H(16C)         | 0.9800     |
|                     |            |                      |            |
| O(3)-S(1)-O(2)      | 118.01(13) | O(3)-S(1)-C(10)      | 110.08(12) |
| O(2)-S(1)-C(10)     | 107.50(11) | O(3)-S(1)-C(13)      | 107.44(13) |
| O(2)-S(1)-C(13)     | 107.19(12) | C(10)-S(1)-C(13)     | 105.95(12) |
| C(7)-O(1)-C(1)      | 119.94(19) | C(6)-C(1)-C(2)       | 121.1(2)   |
| C(6)-C(1)-O(1)      | 117.4(2)   | C(2)-C(1)-O(1)       | 121.3(2)   |
| C(15)-S(2)-C(14)    | 47.6(2)    | C(13)-C(14)-C(15)    | 115.9(6)   |
| C(13)-C(14)-S(2)    | 115.6(5)   | C(15)-C(14)-S(2)     | 66.1(3)    |
| C(13)-C(14)-H(14)   | 116.6      | C(15)-C(14)-H(14)    | 116.6      |
| S(2)-C(14)-H(14)    | 116.6      | C(14)-C(15)-S(2)     | 66.3(2)    |
| C(14)-C(15)-H(15A)  | 117.1      | S(2)-C(15)-H(15A)    | 117.1      |
| C(14)-C(15)-H(15B)  | 117.1      | S(2)-C(15)-H(15B)    | 117.1      |
| H(15A)-C(15)-H(15B) | 114.1      | C(15')-S(2')-C(14')  | 47.9       |
| C(15')-C(14')-C(13) | 129(2)     | C(15')-C(14')-S(2')  | 65.6       |
| C(13)-C(14')-S(2')  | 124.0(17)  | C(15')-C(14')-H(14') | 110.3      |
| C(13)-C(14')-H(14') | 110.3      | S(2')-C(14')-H(14')  | 110.3      |
| C(14')-C(15')-S(2') | 66.5       | C(14')-C(15')-H(15C) | 117.1      |
| S(2')-C(15')-H(15C) | 117.1      | C(14')-C(15')-H(15D) | 117.1      |
| S(2')-C(15')-H(15D) | 117.1      | H(15C)-C(15')-H(15D) | 114.1      |

|                     |            |                     |            |
|---------------------|------------|---------------------|------------|
| C(3)-C(2)-C(1)      | 119.3(2)   | C(3)-C(2)-H(2)      | 120.3      |
| C(1)-C(2)-H(2)      | 120.3      | C(2)-C(3)-C(4)      | 120.2(2)   |
| C(2)-C(3)-H(3)      | 119.9      | C(4)-C(3)-H(3)      | 119.9      |
| C(5)-C(4)-C(3)      | 120.0(2)   | C(5)-C(4)-H(4)      | 120.0      |
| C(3)-C(4)-H(4)      | 120.0      | C(4)-C(5)-C(6)      | 120.6(2)   |
| C(4)-C(5)-H(5)      | 119.7      | C(6)-C(5)-H(5)      | 119.7      |
| C(1)-C(6)-C(5)      | 118.6(2)   | C(1)-C(6)-H(6)      | 120.7      |
| C(5)-C(6)-H(6)      | 120.7      | O(1)-C(7)-C(12)     | 123.7(2)   |
| O(1)-C(7)-C(8)      | 115.3(2)   | C(12)-C(7)-C(8)     | 121.0(2)   |
| C(9)-C(8)-C(7)      | 121.7(2)   | C(9)-C(8)-H(8)      | 119.2      |
| C(7)-C(8)-H(8)      | 119.2      | C(8)-C(9)-C(10)     | 116.8(2)   |
| C(8)-C(9)-C(16)     | 119.0(2)   | C(10)-C(9)-C(16)    | 124.2(2)   |
| C(11)-C(10)-C(9)    | 121.5(2)   | C(11)-C(10)-S(1)    | 116.36(18) |
| C(9)-C(10)-S(1)     | 122.07(18) | C(10)-C(11)-C(12)   | 120.7(2)   |
| C(10)-C(11)-H(11)   | 119.6      | C(12)-C(11)-H(11)   | 119.6      |
| C(11)-C(12)-C(7)    | 118.3(2)   | C(11)-C(12)-H(12)   | 120.8      |
| C(7)-C(12)-H(12)    | 120.8      | C(14)-C(13)-C(14')  | 11.0(9)    |
| C(14)-C(13)-S(1)    | 115.7(3)   | C(14')-C(13)-S(1)   | 109.7(5)   |
| C(14)-C(13)-H(13A)  | 108.3      | C(14')-C(13)-H(13A) | 103.1      |
| S(1)-C(13)-H(13A)   | 108.3      | C(14)-C(13)-H(13B)  | 108.3      |
| C(14')-C(13)-H(13B) | 119.3      | S(1)-C(13)-H(13B)   | 108.3      |
| H(13A)-C(13)-H(13B) | 107.4      | C(9)-C(16)-H(16A)   | 109.5      |
| C(9)-C(16)-H(16B)   | 109.5      | H(16A)-C(16)-H(16B) | 109.5      |
| C(9)-C(16)-H(16C)   | 109.5      | H(16A)-C(16)-H(16C) | 109.5      |
| H(16B)-C(16)-H(16C) | 109.5      |                     |            |

**Table S2-4.** Anisotropic displacement parameters ( $\text{\AA}^2$ ) for compound **2**. The anisotropic displacement factor exponent takes the form:  $-2\pi^2 [ h^2 a^{*2} U_{11} + \dots + 2 h k a^* b^* U_{12} ]$

|       | $U_{11}$   | $U_{22}$   | $U_{33}$   | $U_{23}$    | $U_{13}$    | $U_{12}$   |
|-------|------------|------------|------------|-------------|-------------|------------|
| S(1)  | 0.0223(4)  | 0.0198(3)  | 0.0383(4)  | 0.0049(2)   | -0.0114(2)  | -0.0051(2) |
| O(1)  | 0.0230(10) | 0.0260(10) | 0.0644(14) | 0.0164(9)   | 0.0038(9)   | 0.0018(7)  |
| C(1)  | 0.0242(13) | 0.0194(11) | 0.0279(12) | 0.0042(9)   | 0.0017(9)   | 0.0001(9)  |
| S(2)  | 0.0398(8)  | 0.0311(5)  | 0.0304(5)  | -0.0094(4)  | 0.0019(4)   | -0.0089(5) |
| C(14) | 0.0249(15) | 0.038(3)   | 0.023(2)   | 0.007(2)    | 0.0001(14)  | -0.008(2)  |
| C(15) | 0.044(3)   | 0.045(3)   | 0.026(2)   | -0.006(2)   | -0.0065(15) | -0.003(2)  |
| S(2') | 0.037(2)   | 0.052(3)   | 0.0362(18) | -0.0122(18) | -0.0130(13) | 0.0124(18) |

|        |            |            |            |             |             |             |
|--------|------------|------------|------------|-------------|-------------|-------------|
| C(14') | 0.0249(15) | 0.038(3)   | 0.023(2)   | 0.007(2)    | 0.0001(14)  | -0.008(2)   |
| C(15') | 0.044(3)   | 0.045(3)   | 0.026(2)   | -0.006(2)   | -0.0065(15) | -0.003(2)   |
| O(2)   | 0.0194(10) | 0.0359(10) | 0.0552(12) | 0.0193(9)   | -0.0131(8)  | -0.0083(7)  |
| C(2)   | 0.0344(15) | 0.0242(12) | 0.0270(12) | -0.0076(10) | 0.0034(10)  | -0.0084(10) |
| O(3)   | 0.0473(13) | 0.0235(9)  | 0.0606(14) | -0.0050(9)  | -0.0185(10) | -0.0048(8)  |
| C(3)   | 0.0323(15) | 0.0340(14) | 0.0236(12) | 0.0018(10)  | -0.0087(10) | -0.0087(11) |
| C(4)   | 0.0353(16) | 0.0246(13) | 0.0468(16) | 0.0031(11)  | -0.0169(12) | 0.0012(11)  |
| C(5)   | 0.0362(16) | 0.0236(13) | 0.0503(17) | -0.0070(11) | -0.0142(12) | -0.0003(11) |
| C(6)   | 0.0276(14) | 0.0279(12) | 0.0253(12) | -0.0019(10) | -0.0090(10) | -0.0035(10) |
| C(7)   | 0.0238(13) | 0.0233(12) | 0.0337(13) | 0.0047(10)  | -0.0039(10) | -0.0016(9)  |
| C(8)   | 0.0206(13) | 0.0287(13) | 0.0248(12) | 0.0014(10)  | -0.0017(9)  | -0.0023(9)  |
| C(9)   | 0.0225(13) | 0.0240(12) | 0.0213(11) | -0.0029(9)  | -0.0075(9)  | 0.0004(9)   |
| C(10)  | 0.0226(13) | 0.0203(11) | 0.0260(12) | 0.0008(9)   | -0.0088(9)  | -0.0028(9)  |
| C(11)  | 0.0196(13) | 0.0252(12) | 0.0330(13) | 0.0056(10)  | -0.0014(9)  | -0.0013(9)  |
| C(12)  | 0.0227(13) | 0.0234(12) | 0.0366(14) | 0.0006(10)  | 0.0010(10)  | 0.0033(9)   |
| C(13)  | 0.0209(13) | 0.0335(14) | 0.0341(14) | 0.0119(11)  | -0.0084(10) | -0.0030(10) |
| C(16)  | 0.0299(14) | 0.0288(13) | 0.0286(13) | 0.0000(10)  | -0.0067(10) | 0.0051(10)  |

---

**Table S2-5.** Hydrogen coordinates and isotropic displacement parameters ( $\text{\AA}^2$ ) for compound **2**.

|        | x       | y       | z      | U(eq) |
|--------|---------|---------|--------|-------|
| H(14)  | 0.4203  | 0.2716  | 0.3988 | 0.035 |
| H(15A) | 0.1273  | 0.2348  | 0.2933 | 0.046 |
| H(15B) | -0.0802 | 0.3029  | 0.3878 | 0.046 |
| H(14') | 0.4144  | 0.2463  | 0.4073 | 0.035 |
| H(15C) | 0.0728  | 0.1131  | 0.5614 | 0.046 |
| H(15D) | 0.3071  | 0.0596  | 0.4713 | 0.046 |
| H(2)   | 0.5707  | -0.0939 | 0.9595 | 0.035 |
| H(3)   | 0.8496  | -0.2472 | 0.9916 | 0.035 |
| H(4)   | 0.8256  | -0.4378 | 0.9315 | 0.042 |
| H(5)   | 0.5203  | -0.4760 | 0.8416 | 0.043 |
| H(6)   | 0.2407  | -0.3226 | 0.8060 | 0.032 |
| H(8)   | -0.0783 | 0.0723  | 0.8859 | 0.030 |
| H(11)  | 0.6253  | 0.1526  | 0.6360 | 0.032 |
| H(12)  | 0.5801  | -0.0390 | 0.7265 | 0.035 |
| H(13A) | 0.0167  | 0.3633  | 0.5567 | 0.036 |

|        |         |        |        |       |
|--------|---------|--------|--------|-------|
| H(13B) | 0.2004  | 0.4482 | 0.4787 | 0.036 |
| H(16A) | -0.2461 | 0.2621 | 0.8630 | 0.044 |
| H(16B) | -0.1621 | 0.3315 | 0.7422 | 0.044 |
| H(16C) | -0.0597 | 0.3628 | 0.8504 | 0.044 |

---

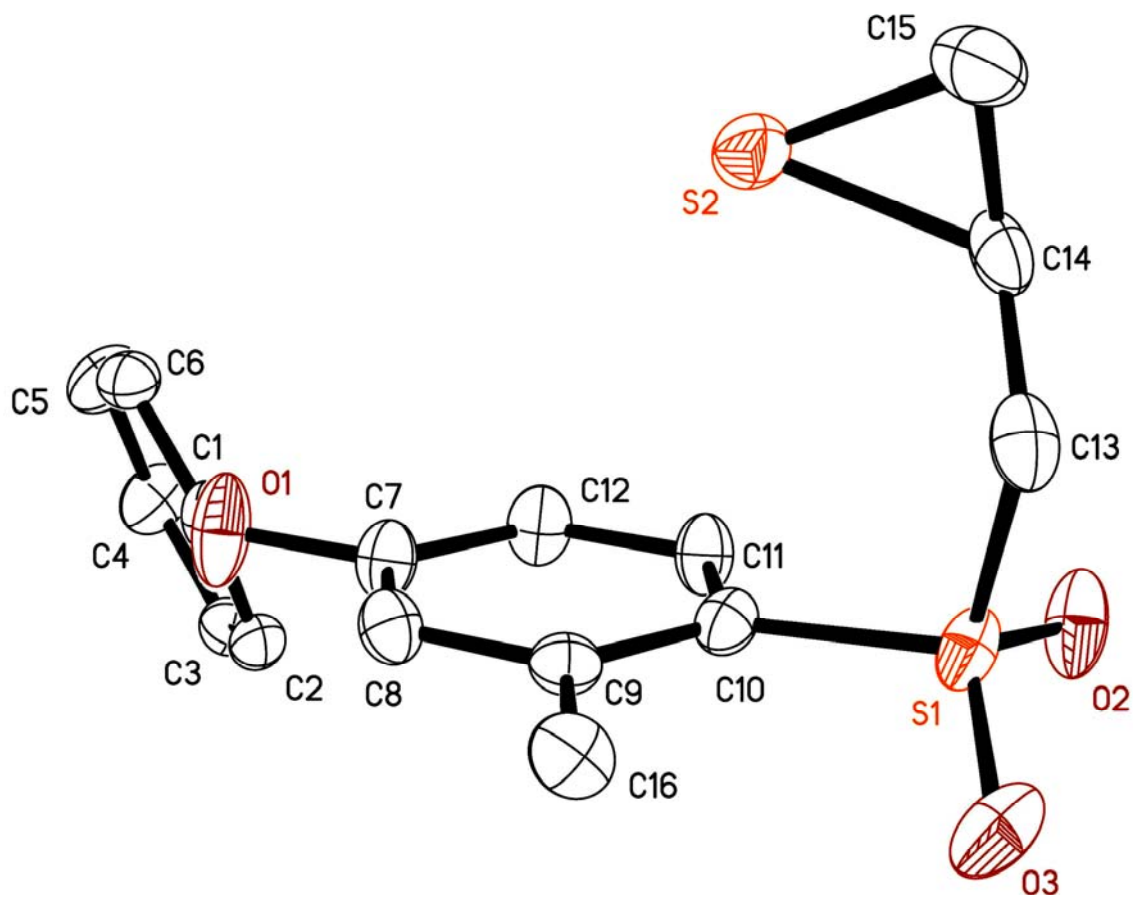

**Figure S2.** The ORTEP diagram of compound **2** is shown at 50% probability level. Hydrogen atoms are omitted for clarity.

**Table S3-1.** Crystal data and structure refinement for compound **3**.

|                                   |                                                               |                 |
|-----------------------------------|---------------------------------------------------------------|-----------------|
| Identification code               | dh29_3_0m                                                     |                 |
| Empirical formula                 | C <sub>17</sub> H <sub>18</sub> O <sub>3</sub> S <sub>2</sub> |                 |
| Formula weight                    | 334.43                                                        |                 |
| Temperature                       | 100(2) K                                                      |                 |
| Wavelength                        | 1.54178 Å                                                     |                 |
| Crystal system                    | Triclinic                                                     |                 |
| Space group                       | P -1                                                          |                 |
| Unit cell dimensions              | a = 5.4528(3) Å                                               | α = 88.396(2)°. |
|                                   | b = 11.4721(5) Å                                              | β = 81.581(2)°. |
|                                   | c = 13.0581(6) Å                                              | γ = 79.755(2)°. |
| Volume                            | 795.16(7) Å <sup>3</sup>                                      |                 |
| Z                                 | 2                                                             |                 |
| Density (calculated)              | 1.397 Mg/m <sup>3</sup>                                       |                 |
| Absorption coefficient            | 3.117 mm <sup>-1</sup>                                        |                 |
| F(000)                            | 352                                                           |                 |
| Crystal size                      | 0.26 x 0.10 x 0.03 mm <sup>3</sup>                            |                 |
| Crystal color and habit           | clear colorless needle                                        |                 |
| Diffractometer                    | Bruker SMART Apex CCD diffractometer                          |                 |
| Theta range for data collection   | 3.42 to 69.42°.                                               |                 |
| Index ranges                      | -5 ≤ h ≤ 6, -13 ≤ k ≤ 13, -15 ≤ l ≤ 15                        |                 |
| Reflections collected             | 11197                                                         |                 |
| Independent reflections           | 2781 [R(int) = 0.0231]                                        |                 |
| Observed reflections (I > 2σ(I))  | 2639                                                          |                 |
| Completeness to theta = 69.42°    | 93.1 %                                                        |                 |
| Absorption correction             | Semi-empirical from equivalents                               |                 |
| Max. and min. transmission        | 0.9234 and 0.5002                                             |                 |
| Solution method                   | XS (Sheldrick, 2001)                                          |                 |
| Refinement method                 | XL (Sheldrick, 2001)                                          |                 |
| Data / restraints / parameters    | 2781 / 18 / 305                                               |                 |
| Goodness-of-fit on F <sup>2</sup> | 1.057                                                         |                 |
| Final R indices [I > 2σ(I)]       | R <sub>1</sub> = 0.0592, wR <sub>2</sub> = 0.1549             |                 |
| R indices (all data)              | R <sub>1</sub> = 0.0612, wR <sub>2</sub> = 0.1566             |                 |
| Largest diff. peak and hole       | 0.616 and -0.469 e.Å <sup>-3</sup>                            |                 |

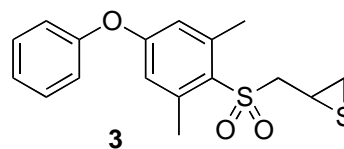



**Table S3-2.** Atomic coordinates and equivalent isotropic displacement parameters ( $\text{\AA}^2$ ) for compound **3**.  $U(\text{eq})$  is defined as one third of the trace of the orthogonalized  $U_{ij}$  tensor.

|        | x           | y           | z          | $U(\text{eq})$ |
|--------|-------------|-------------|------------|----------------|
| S(1)   | 0.16676(14) | 0.35453(6)  | 0.86467(7) | 0.0416(3)      |
| S(2)   | 0.50512(18) | 0.29353(8)  | 1.15166(7) | 0.0497(3)      |
| O(1')  | 0.9599(14)  | -0.0332(9)  | 0.6460(8)  | 0.058(3)       |
| O(1)   | 0.8346(13)  | 0.0069(3)   | 0.5916(4)  | 0.071(2)       |
| O(2)   | 0.1232(5)   | 0.4626(2)   | 0.8073(3)  | 0.0631(8)      |
| O(3)   | -0.0536(4)  | 0.3107(2)   | 0.9141(2)  | 0.0549(7)      |
| C(1)   | 0.8492(10)  | -0.1133(2)  | 0.5964(4)  | 0.0307(15)     |
| C(2)   | 0.6807(7)   | -0.1701(5)  | 0.5554(4)  | 0.0440(17)     |
| C(3)   | 0.7163(8)   | -0.2931(5)  | 0.5542(4)  | 0.0501(16)     |
| C(4)   | 0.9203(12)  | -0.3593(2)  | 0.5941(5)  | 0.0369(17)     |
| C(5)   | 1.0887(9)   | -0.3025(5)  | 0.6351(4)  | 0.052(2)       |
| C(6)   | 1.0532(8)   | -0.1795(6)  | 0.6363(4)  | 0.0482(16)     |
| C(1')  | 0.9103(18)  | -0.1361(7)  | 0.6123(6)  | 0.018(2)       |
| C(2')  | 0.7442(15)  | -0.1319(6)  | 0.5405(6)  | 0.030(3)       |
| C(3')  | 0.6965(12)  | -0.2363(10) | 0.5025(7)  | 0.043(3)       |
| C(4')  | 0.8149(19)  | -0.3450(6)  | 0.5363(9)  | 0.053(4)       |
| C(5')  | 0.981(2)    | -0.3492(6)  | 0.6081(9)  | 0.047(4)       |
| C(6')  | 1.0287(17)  | -0.2447(10) | 0.6461(6)  | 0.041(3)       |
| C(7)   | 0.6724(10)  | 0.0795(3)   | 0.6606(3)  | 0.0348(14)     |
| C(8)   | 0.6956(9)   | 0.1981(3)   | 0.6506(3)  | 0.0352(13)     |
| C(9)   | 0.5350(9)   | 0.2824(3)   | 0.7147(3)  | 0.0276(11)     |
| C(10)  | 0.3512(9)   | 0.2480(4)   | 0.7888(4)  | 0.0267(15)     |
| C(11)  | 0.3280(10)  | 0.1294(4)   | 0.7988(5)  | 0.0326(18)     |
| C(12)  | 0.4886(10)  | 0.0451(3)   | 0.7347(5)  | 0.0260(15)     |
| C(7')  | 0.7652(16)  | 0.0499(7)   | 0.6873(7)  | 0.037(3)       |
| C(8')  | 0.7996(15)  | 0.1670(7)   | 0.6765(6)  | 0.038(3)       |
| C(9')  | 0.6174(16)  | 0.2569(6)   | 0.7244(6)  | 0.029(3)       |
| C(10') | 0.4008(15)  | 0.2297(8)   | 0.7831(7)  | 0.024(3)       |
| C(11') | 0.3664(15)  | 0.1126(9)   | 0.7939(9)  | 0.015(2)       |
| C(12') | 0.5486(17)  | 0.0227(7)   | 0.7460(9)  | 0.023(3)       |
| C(13)  | 0.6055(11)  | 0.4031(4)   | 0.6961(3)  | 0.0627(12)     |
| C(14)  | 0.1369(7)   | 0.0751(3)   | 0.8696(4)  | 0.0499(9)      |
| C(15)  | 0.3474(6)   | 0.3795(3)   | 0.9622(2)  | 0.0369(7)      |

|        |            |           |            |            |
|--------|------------|-----------|------------|------------|
| C(16)  | 0.4211(11) | 0.2703(5) | 1.0279(6)  | 0.0283(14) |
| C(16') | 0.313(4)   | 0.286(2)  | 1.0475(16) | 0.072(5)   |
| C(17)  | 0.2267(9)  | 0.2477(4) | 1.1174(4)  | 0.0344(12) |
| C(17') | 0.4543(15) | 0.1711(6) | 1.0510(5)  | 0.024(2)   |

**Table S3-3.** Bond lengths [ $\text{\AA}$ ] and angles [ $^\circ$ ] for compound **3**.

|               |          |               |           |
|---------------|----------|---------------|-----------|
| S(1)-O(2)     | 1.431(3) | S(1)-O(3)     | 1.443(3)  |
| S(1)-C(10)    | 1.681(3) | S(1)-C(15)    | 1.779(3)  |
| S(1)-C(10')   | 1.962(7) | S(2)-C(16)    | 1.782(8)  |
| S(2)-C(17)    | 1.810(5) | S(2)-C(16')   | 1.846(19) |
| S(2)-C(17')   | 2.031(7) | O(1')-C(7')   | 1.352(10) |
| O(1')-C(1')   | 1.355(9) | O(1)-C(7)     | 1.354(5)  |
| O(1)-C(1)     | 1.366(4) | C(1)-C(2)     | 1.3900    |
| C(1)-C(6)     | 1.3900   | C(2)-C(3)     | 1.3900    |
| C(2)-H(2)     | 0.9500   | C(3)-C(4)     | 1.3900    |
| C(3)-H(3)     | 0.9500   | C(4)-C(5)     | 1.3900    |
| C(4)-H(4)     | 0.9500   | C(5)-C(6)     | 1.3900    |
| C(5)-H(5)     | 0.9500   | C(6)-H(6)     | 0.9500    |
| C(1')-C(2')   | 1.3900   | C(1')-C(6')   | 1.3900    |
| C(2')-C(3')   | 1.3900   | C(2')-H(2')   | 0.9500    |
| C(3')-C(4')   | 1.3900   | C(3')-H(3')   | 0.9500    |
| C(4')-C(5')   | 1.3900   | C(4')-H(4')   | 0.9500    |
| C(5')-C(6')   | 1.3900   | C(5')-H(5')   | 0.9500    |
| C(6')-H(6')   | 0.9500   | C(7)-C(8)     | 1.3900    |
| C(7)-C(12)    | 1.3900   | C(8)-C(9)     | 1.3900    |
| C(8)-H(8)     | 0.9500   | C(9)-C(10)    | 1.3900    |
| C(9)-C(13)    | 1.506(5) | C(10)-C(11)   | 1.3900    |
| C(11)-C(12)   | 1.3900   | C(11)-C(14)   | 1.498(4)  |
| C(12)-H(12)   | 0.9500   | C(7')-C(8')   | 1.3900    |
| C(7')-C(12')  | 1.3900   | C(8')-C(9')   | 1.3900    |
| C(8')-H(8')   | 0.9500   | C(9')-C(10')  | 1.3900    |
| C(9')-C(13)   | 1.698(8) | C(10')-C(11') | 1.3900    |
| C(11')-C(12') | 1.3900   | C(11')-C(14)  | 1.592(7)  |
| C(12')-H(12') | 0.9500   | C(13)-H(13A)  | 0.96(5)   |
| C(13)-H(13B)  | 0.93(5)  | C(13)-H(13C)  | 0.85(5)   |

|                    |            |                   |            |
|--------------------|------------|-------------------|------------|
| C(14)-H(14A)       | 0.95(4)    | C(14)-H(14B)      | 0.91(5)    |
| C(14)-H(14C)       | 0.87(5)    | C(15)-C(16)       | 1.526(8)   |
| C(15)-C(16')       | 1.54(2)    | C(15)-H(15A)      | 0.9900     |
| C(15)-H(15B)       | 0.9900     | C(16)-C(17)       | 1.508(6)   |
| C(16)-H(16)        | 1.0000     | C(16')-C(17')     | 1.40(2)    |
| C(16')-H(16')      | 1.0000     | C(17)-H(17A)      | 0.9900     |
| C(17)-H(17B)       | 0.9900     | C(17')-H(17C)     | 0.9900     |
| C(17')-H(17D)      | 0.9900     |                   |            |
| O(2)-S(1)-O(3)     | 116.52(16) | O(2)-S(1)-C(10)   | 110.0(2)   |
| O(3)-S(1)-C(10)    | 109.3(2)   | O(2)-S(1)-C(15)   | 106.96(15) |
| O(3)-S(1)-C(15)    | 108.13(16) | C(10)-S(1)-C(15)  | 105.3(3)   |
| O(2)-S(1)-C(10')   | 111.9(3)   | O(3)-S(1)-C(10')  | 110.9(3)   |
| C(15)-S(1)-C(10')  | 101.1(3)   | C(16)-S(2)-C(17)  | 49.6(2)    |
| C(16')-S(2)-C(17') | 42.1(7)    | C(7')-O(1')-C(1') | 118.7(7)   |
| C(7)-O(1)-C(1)     | 121.4(4)   | O(1)-C(1)-C(2)    | 122.2(6)   |
| O(1)-C(1)-C(6)     | 117.6(6)   | C(2)-C(1)-C(6)    | 120.0      |
| C(3)-C(2)-C(1)     | 120.0      | C(3)-C(2)-H(2)    | 120.0      |
| C(1)-C(2)-H(2)     | 120.0      | C(2)-C(3)-C(4)    | 120.0      |
| C(2)-C(3)-H(3)     | 120.0      | C(4)-C(3)-H(3)    | 120.0      |
| C(5)-C(4)-C(3)     | 120.0      | C(5)-C(4)-H(4)    | 120.0      |
| C(3)-C(4)-H(4)     | 120.0      | C(4)-C(5)-C(6)    | 120.0      |
| C(4)-C(5)-H(5)     | 120.0      | C(6)-C(5)-H(5)    | 120.0      |
| C(5)-C(6)-C(1)     | 120.0      | C(5)-C(6)-H(6)    | 120.0      |
| C(1)-C(6)-H(6)     | 120.0      | O(1')-C(1')-C(2') | 119.0(9)   |
| O(1')-C(1')-C(6')  | 120.9(9)   | C(2')-C(1')-C(6') | 120.0      |
| C(1')-C(2')-C(3')  | 120.0      | C(1')-C(2')-H(2') | 120.0      |
| C(3')-C(2')-H(2')  | 120.0      | C(2')-C(3')-C(4') | 120.0      |
| C(2')-C(3')-H(3')  | 120.0      | C(4')-C(3')-H(3') | 120.0      |
| C(3')-C(4')-C(5')  | 120.0      | C(3')-C(4')-H(4') | 120.0      |
| C(5')-C(4')-H(4')  | 120.0      | C(6')-C(5')-C(4') | 120.0      |
| C(6')-C(5')-H(5')  | 120.0      | C(4')-C(5')-H(5') | 120.0      |
| C(5')-C(6')-C(1')  | 120.0      | C(5')-C(6')-H(6') | 120.0      |
| C(1')-C(6')-H(6')  | 120.0      | O(1)-C(7)-C(8)    | 114.3(3)   |
| O(1)-C(7)-C(12)    | 125.7(3)   | C(8)-C(7)-C(12)   | 120.0      |
| C(9)-C(8)-C(7)     | 120.0      | C(9)-C(8)-H(8)    | 120.0      |

|                     |           |                      |          |
|---------------------|-----------|----------------------|----------|
| C(7)-C(8)-H(8)      | 120.0     | C(8)-C(9)-C(10)      | 120.0    |
| C(8)-C(9)-C(13)     | 111.1(3)  | C(10)-C(9)-C(13)     | 128.7(3) |
| C(11)-C(10)-C(9)    | 120.0     | C(11)-C(10)-S(1)     | 122.7(3) |
| C(9)-C(10)-S(1)     | 117.3(3)  | C(10)-C(11)-C(12)    | 120.0    |
| C(10)-C(11)-C(14)   | 128.3(3)  | C(12)-C(11)-C(14)    | 111.6(4) |
| C(11)-C(12)-C(7)    | 120.0     | C(11)-C(12)-H(12)    | 120.0    |
| C(7)-C(12)-H(12)    | 120.0     | O(1')-C(7')-C(8')    | 116.5(7) |
| O(1')-C(7')-C(12')  | 123.3(7)  | C(8')-C(7')-C(12')   | 120.0    |
| C(9')-C(8')-C(7')   | 120.0     | C(9')-C(8')-H(8')    | 120.0    |
| C(7')-C(8')-H(8')   | 120.0     | C(10')-C(9')-C(8')   | 120.0    |
| C(10')-C(9')-C(13)  | 114.6(5)  | C(8')-C(9')-C(13)    | 124.0(5) |
| C(9')-C(10')-C(11') | 120.0     | C(9')-C(10')-S(1)    | 119.4(5) |
| C(11')-C(10')-S(1)  | 120.1(5)  | C(12')-C(11')-C(10') | 120.0    |
| C(12')-C(11')-C(14) | 117.6(6)  | C(10')-C(11')-C(14)  | 122.0(7) |
| C(11')-C(12')-C(7') | 120.0     | C(11')-C(12')-H(12') | 120.0    |
| C(7')-C(12')-H(12') | 120.0     | C(9)-C(13)-H(13A)    | 115(3)   |
| C(9')-C(13)-H(13A)  | 110(3)    | C(9)-C(13)-H(13B)    | 105(3)   |
| C(9')-C(13)-H(13B)  | 92(3)     | H(13A)-C(13)-H(13B)  | 108(4)   |
| C(9)-C(13)-H(13C)   | 108(3)    | C(9')-C(13)-H(13C)   | 122(3)   |
| H(13A)-C(13)-H(13C) | 120(4)    | H(13B)-C(13)-H(13C)  | 98(4)    |
| C(11)-C(14)-H(14A)  | 113(3)    | C(11')-C(14)-H(14A)  | 115(3)   |
| C(11)-C(14)-H(14B)  | 113(3)    | C(11')-C(14)-H(14B)  | 105(3)   |
| H(14A)-C(14)-H(14B) | 105(4)    | C(11)-C(14)-H(14C)   | 112(3)   |
| C(11')-C(14)-H(14C) | 118(3)    | H(14A)-C(14)-H(14C)  | 108(4)   |
| H(14B)-C(14)-H(14C) | 105(4)    | C(16)-C(15)-S(1)     | 113.7(3) |
| C(16')-C(15)-S(1)   | 107.5(7)  | C(16)-C(15)-H(15A)   | 108.8    |
| C(16')-C(15)-H(15A) | 129.8     | S(1)-C(15)-H(15A)    | 108.8    |
| C(16)-C(15)-H(15B)  | 108.8     | C(16')-C(15)-H(15B)  | 91.8     |
| S(1)-C(15)-H(15B)   | 108.8     | H(15A)-C(15)-H(15B)  | 107.7    |
| C(17)-C(16)-C(15)   | 116.0(4)  | C(17)-C(16)-S(2)     | 66.1(3)  |
| C(15)-C(16)-S(2)    | 117.5(4)  | C(17)-C(16)-H(16)    | 116.0    |
| C(15)-C(16)-H(16)   | 116.0     | S(2)-C(16)-H(16)     | 116.0    |
| C(17')-C(16')-C(15) | 127.0(15) | C(17')-C(16')-S(2)   | 76.0(10) |
| C(15)-C(16')-S(2)   | 113.1(10) | C(17')-C(16')-H(16') | 111.8    |
| C(15)-C(16')-H(16') | 111.8     | S(2)-C(16')-H(16')   | 111.8    |
| C(16)-C(17)-S(2)    | 64.2(4)   | C(16)-C(17)-H(17A)   | 117.3    |

|                    |         |                      |       |
|--------------------|---------|----------------------|-------|
| S(2)-C(17)-H(17A)  | 117.3   | C(16)-C(17)-H(17B)   | 117.3 |
| S(2)-C(17)-H(17B)  | 117.3   | H(17A)-C(17)-H(17B)  | 114.4 |
| C(16')-C(17')-S(2) | 61.9(8) | C(16')-C(17')-H(17C) | 117.6 |
| S(2)-C(17')-H(17C) | 117.6   | C(16')-C(17')-H(17D) | 117.6 |
| S(2)-C(17')-H(17D) | 117.6   | H(17C)-C(17')-H(17D) | 114.7 |

**Table S3-4.** Anisotropic displacement parameters ( $\text{\AA}^2$ ) for compound **3**. The anisotropic displacement factor exponent takes the form:  $-2\pi^2[h^2a^*U_{11} + \dots + 2hk a^* b^* U_{12}]$

|       | $U_{11}$   | $U_{22}$   | $U_{33}$  | $U_{23}$    | $U_{13}$    | $U_{12}$    |
|-------|------------|------------|-----------|-------------|-------------|-------------|
| S(1)  | 0.0300(4)  | 0.0258(4)  | 0.0698(6) | -0.0035(3)  | -0.0108(3)  | -0.0036(3)  |
| S(2)  | 0.0524(6)  | 0.0478(5)  | 0.0494(5) | -0.0066(4)  | 0.0016(4)   | -0.0166(4)  |
| O(1') | 0.028(4)   | 0.061(6)   | 0.084(7)  | -0.052(5)   | 0.019(4)    | -0.019(4)   |
| O(1)  | 0.101(5)   | 0.0183(18) | 0.074(3)  | -0.0081(18) | 0.057(3)    | -0.015(2)   |
| O(2)  | 0.0561(17) | 0.0344(13) | 0.106(2)  | 0.0098(13)  | -0.0374(15) | -0.0068(11) |
| O(3)  | 0.0242(12) | 0.0385(13) | 0.100(2)  | -0.0145(12) | -0.0011(12) | -0.0040(9)  |
| C(1)  | 0.028(3)   | 0.021(2)   | 0.038(3)  | 0.002(2)    | 0.008(2)    | 0.000(2)    |
| C(2)  | 0.040(4)   | 0.032(3)   | 0.060(4)  | -0.002(3)   | -0.020(3)   | 0.002(3)    |
| C(3)  | 0.035(4)   | 0.046(4)   | 0.072(5)  | -0.016(4)   | -0.004(3)   | -0.016(3)   |
| C(4)  | 0.033(3)   | 0.021(3)   | 0.051(4)  | -0.003(2)   | 0.014(3)    | -0.005(2)   |
| C(5)  | 0.050(5)   | 0.041(5)   | 0.060(4)  | 0.003(3)    | -0.011(3)   | 0.006(3)    |
| C(6)  | 0.042(4)   | 0.041(4)   | 0.063(4)  | -0.013(3)   | -0.009(3)   | -0.007(3)   |
| C(1') | 0.017(3)   | 0.015(3)   | 0.020(3)  | -0.0012(18) | -0.0012(18) | 0.0003(19)  |
| C(2') | 0.018(5)   | 0.020(5)   | 0.053(7)  | -0.004(4)   | -0.005(4)   | -0.006(4)   |
| C(3') | 0.031(5)   | 0.050(7)   | 0.050(6)  | -0.020(6)   | 0.004(4)    | -0.018(5)   |
| C(4') | 0.021(6)   | 0.035(6)   | 0.093(11) | -0.013(7)   | 0.025(7)    | -0.005(4)   |
| C(5') | 0.042(8)   | 0.023(6)   | 0.072(10) | 0.016(6)    | 0.008(6)    | -0.007(5)   |
| C(6') | 0.027(6)   | 0.054(11)  | 0.041(6)  | 0.015(6)    | -0.013(4)   | -0.002(6)   |
| C(7)  | 0.044(4)   | 0.019(2)   | 0.034(3)  | -0.0035(18) | 0.012(2)    | 0.001(2)    |
| C(8)  | 0.046(3)   | 0.022(2)   | 0.034(3)  | 0.0046(19)  | 0.009(2)    | -0.009(2)   |
| C(9)  | 0.035(3)   | 0.016(2)   | 0.030(2)  | 0.0024(16)  | -0.004(2)   | 0.0012(19)  |
| C(10) | 0.020(3)   | 0.015(2)   | 0.043(3)  | -0.004(2)   | 0.000(2)    | 0.000(2)    |
| C(11) | 0.018(3)   | 0.029(3)   | 0.048(3)  | -0.010(2)   | 0.005(2)    | -0.002(2)   |
| C(12) | 0.024(3)   | 0.016(2)   | 0.038(3)  | 0.005(2)    | -0.005(3)   | -0.003(2)   |
| C(7') | 0.021(6)   | 0.040(6)   | 0.052(7)  | -0.013(5)   | 0.002(4)    | -0.014(4)   |
| C(8') | 0.039(6)   | 0.048(7)   | 0.028(5)  | -0.011(4)   | 0.008(4)    | -0.018(5)   |
| C(9') | 0.028(3)   | 0.029(3)   | 0.030(3)  | -0.0006(19) | -0.0042(18) | -0.009(2)   |

|        |            |            |            |             |             |             |
|--------|------------|------------|------------|-------------|-------------|-------------|
| C(10') | 0.021(5)   | 0.023(5)   | 0.024(5)   | -0.013(4)   | -0.004(4)   | 0.010(4)    |
| C(11') | 0.017(3)   | 0.011(3)   | 0.018(3)   | -0.0002(18) | -0.0033(18) | -0.0029(19) |
| C(12') | 0.017(5)   | 0.013(4)   | 0.036(6)   | -0.010(4)   | -0.002(4)   | 0.007(4)    |
| C(13)  | 0.104(4)   | 0.044(2)   | 0.046(2)   | -0.0016(16) | 0.005(2)    | -0.043(2)   |
| C(14)  | 0.0350(19) | 0.0305(17) | 0.080(3)   | -0.0080(16) | 0.0176(17)  | -0.0151(13) |
| C(15)  | 0.0346(17) | 0.0284(15) | 0.0469(17) | -0.0112(12) | 0.0011(13)  | -0.0072(11) |
| C(16)  | 0.018(3)   | 0.026(3)   | 0.040(3)   | -0.0050(18) | 0.007(3)    | -0.009(2)   |
| C(16') | 0.051(12)  | 0.113(15)  | 0.071(14)  | -0.005(10)  | -0.025(10)  | -0.051(12)  |
| C(17)  | 0.030(3)   | 0.038(2)   | 0.035(2)   | -0.0050(19) | 0.0094(19)  | -0.0162(19) |
| C(17') | 0.044(5)   | 0.010(4)   | 0.016(3)   | -0.004(2)   | -0.007(3)   | 0.006(3)    |

---

**Table S3-5.** Hydrogen coordinates and isotropic displacement parameters ( $\text{\AA}^2$ ) for compound **3**.

|        | x         | y         | z        | U(eq) |
|--------|-----------|-----------|----------|-------|
| H(2)   | 0.5413    | -0.1248   | 0.5281   | 0.053 |
| H(3)   | 0.6012    | -0.3319   | 0.5262   | 0.060 |
| H(4)   | 0.9446    | -0.4433   | 0.5933   | 0.044 |
| H(5)   | 1.2282    | -0.3477   | 0.6624   | 0.062 |
| H(6)   | 1.1683    | -0.1406   | 0.6643   | 0.058 |
| H(2')  | 0.6633    | -0.0576   | 0.5174   | 0.036 |
| H(3')  | 0.5830    | -0.2335   | 0.4535   | 0.052 |
| H(4')  | 0.7823    | -0.4164   | 0.5104   | 0.064 |
| H(5')  | 1.0619    | -0.4235   | 0.6312   | 0.057 |
| H(6')  | 1.1422    | -0.2476   | 0.6952   | 0.049 |
| H(8)   | 0.8212    | 0.2216    | 0.5999   | 0.042 |
| H(12)  | 0.4728    | -0.0360   | 0.7415   | 0.031 |
| H(8')  | 0.9476    | 0.1856    | 0.6364   | 0.046 |
| H(12') | 0.5251    | -0.0574   | 0.7534   | 0.028 |
| H(13A) | 0.607(9)  | 0.447(4)  | 0.757(4) | 0.075 |
| H(13B) | 0.768(10) | 0.389(4)  | 0.660(4) | 0.075 |
| H(13C) | 0.529(10) | 0.436(4)  | 0.648(4) | 0.075 |
| H(14A) | 0.130(8)  | 0.095(4)  | 0.940(4) | 0.060 |
| H(14B) | 0.166(8)  | -0.005(4) | 0.868(3) | 0.060 |
| H(14C) | -0.013(9) | 0.096(4)  | 0.853(3) | 0.060 |
| H(15A) | 0.5025    | 0.4067    | 0.9289   | 0.044 |
| H(15B) | 0.2493    | 0.4437    | 1.0082   | 0.044 |

|        |        |        |        |       |
|--------|--------|--------|--------|-------|
| H(16)  | 0.5183 | 0.1986 | 0.9894 | 0.034 |
| H(16') | 0.1319 | 0.2878 | 1.0755 | 0.086 |
| H(17A) | 0.2072 | 0.1644 | 1.1318 | 0.041 |
| H(17B) | 0.0672 | 0.3055 | 1.1286 | 0.041 |
| H(17C) | 0.5917 | 0.1467 | 0.9932 | 0.029 |
| H(17D) | 0.3640 | 0.1071 | 1.0795 | 0.029 |

---

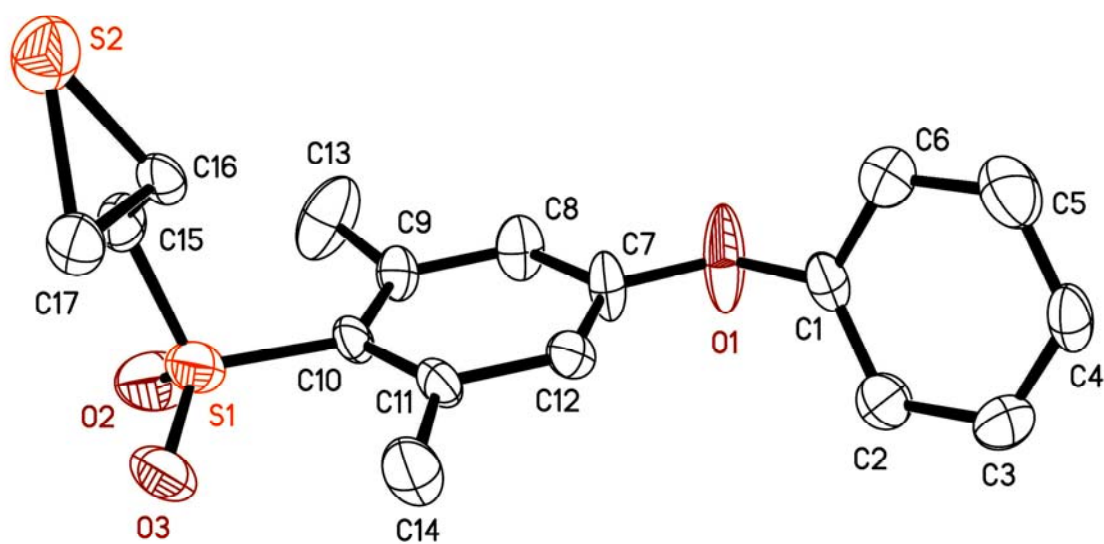

**Figure S3.** The ORTEP diagram of compound **3** is shown at 50% probability level. Hydrogen atoms are omitted for clarity.
